# Supplementary material
Source: Springer Nature journal article supplement (https://www.springermedizin.de/resource/supplementary/12879_2012_2141_MOESM1_ESM.pdf/9443792)

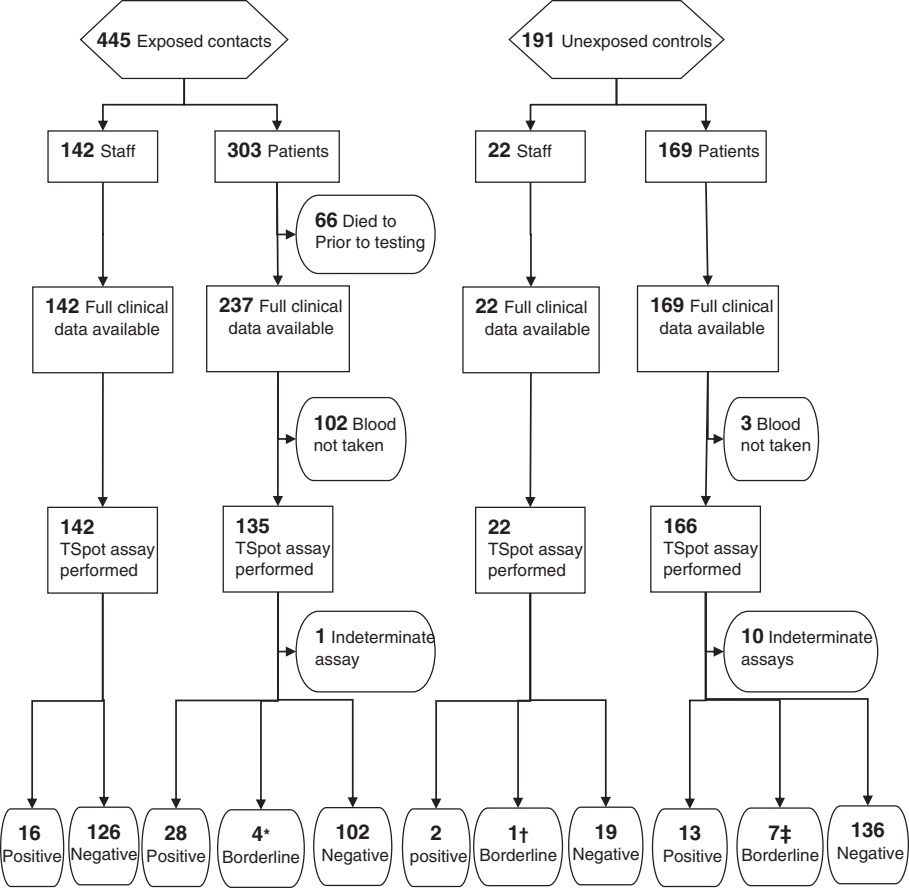

Supplement: MOESM1 [file 9443792]
